# Supplementary material
Source: PubMed Central journal article supplement (PMC4597785)
Supplement: NIHMS691455-supplement-SDC_1.pdf [file NIHMS691455-supplement-SDC_1.pdf]

# Extended Regional Anesthesia after TKA

## WOMAC Scores (Improvement from Baseline)

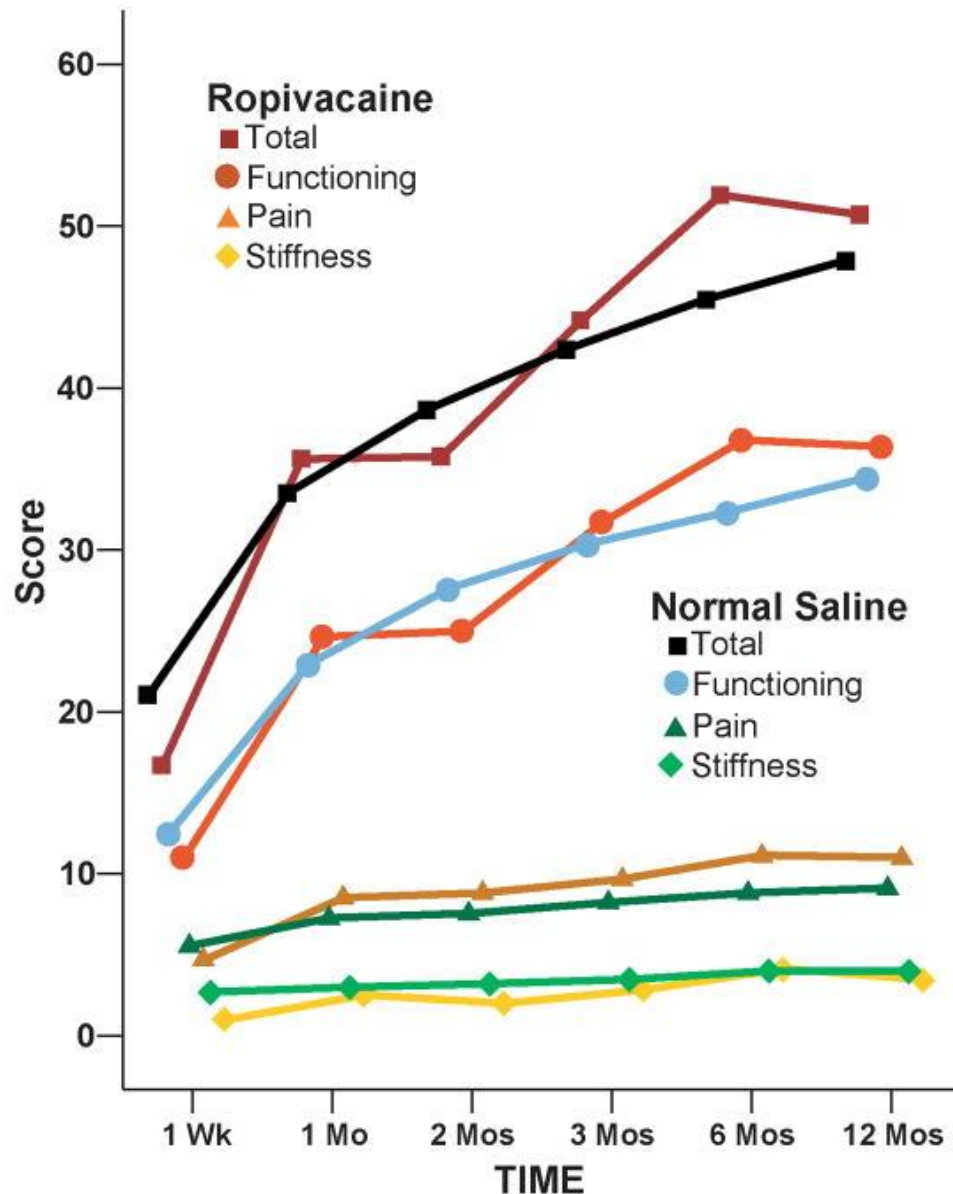

*Ilfeld BM, et al. Health-related quality of life after hip arthroplasty with and without an extended-duration continuous posterior lumbar plexus nerve block. Anesth Analg. 2009; 109(2):586-91. Copyright © 2009, International Anesthesia Research Society.*
