# Supplementary material
Source: PubMed Central journal article supplement (PMC4597785)
Supplement: NIHMS691455-supplement-SDC_2.pdf [file NIHMS691455-supplement-SDC_2.pdf]

# Meta-Analysis: Knee Replacement

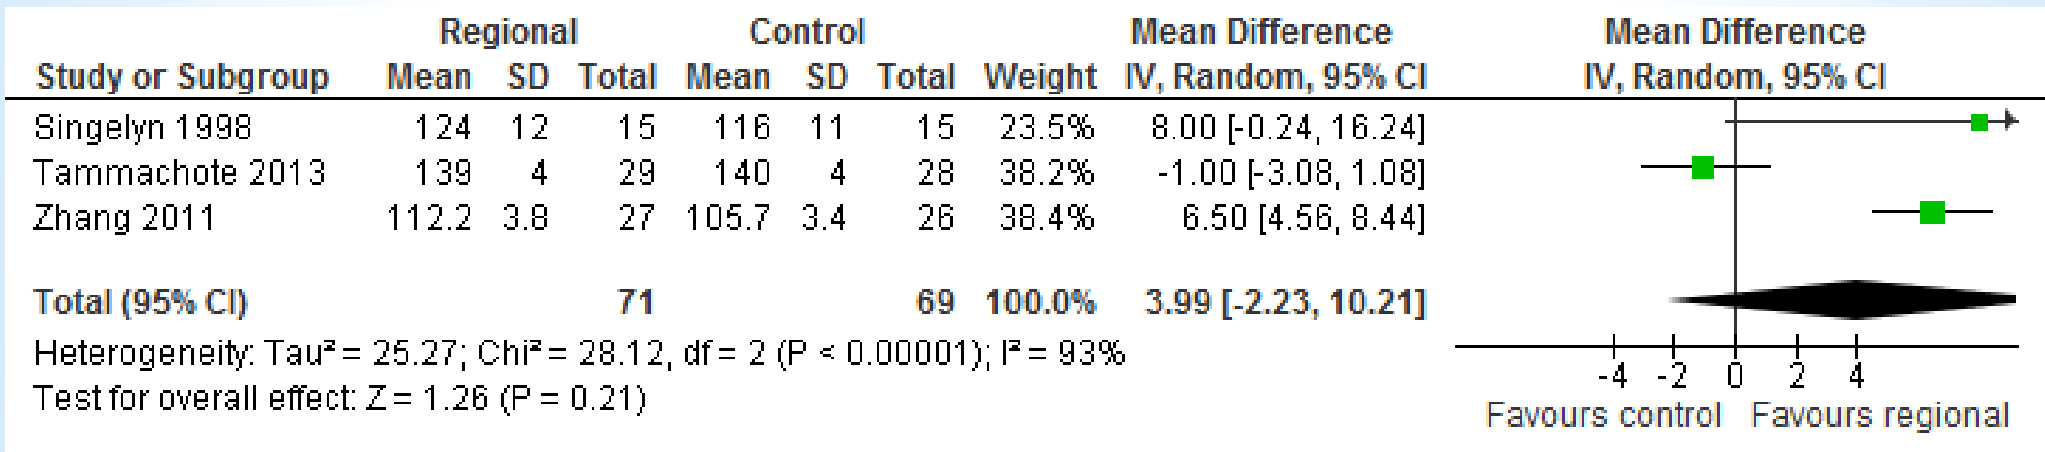

Unpublished *preliminary* findings of our systematic review in the editorial phase with the Cochrane Collaboration.

From Atchabahian A, Schwartz G, Hall CB, Lajam CM, Andreae MH. Regional analgesia for improvement of long-term functional outcome after elective large joint replacement (Protocol). *Cochrane Database Syst Rev* 2012, Issue 12. Art. No.: CD010278. Copyright © 2012 The Cochrane Collaboration. Published by John Wiley & Sons, Ltd.
