# Supplementary material
Source: PubMed Central journal article supplement (PMC4597785)
Supplement: NIHMS691455-supplement-SDC_3.pdf [file NIHMS691455-supplement-SDC_3.pdf]

# Anesthesia and long-term cognitive outcomes

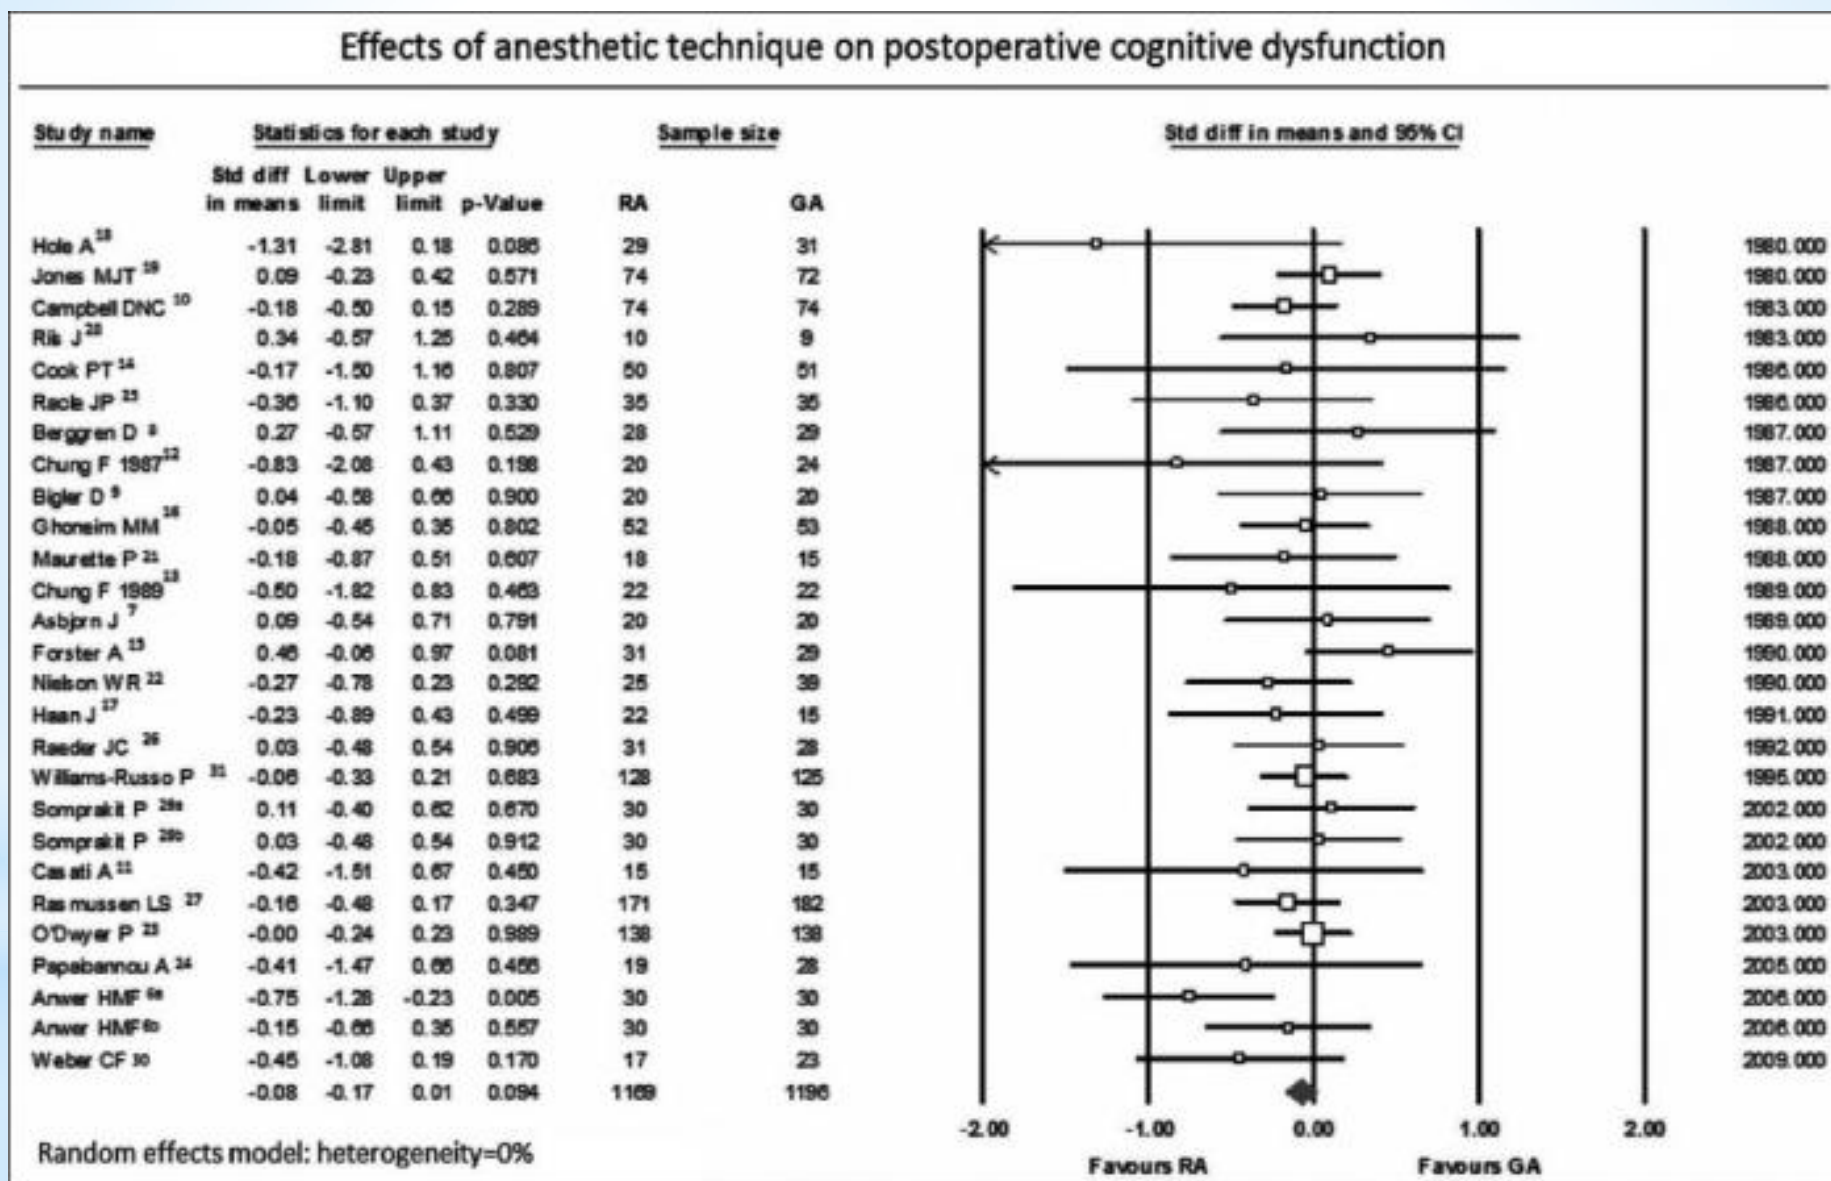

Guay J. General anaesthesia does not contribute to long-term post-operative cognitive dysfunction in adults. *Ind J Anaesth* 2011; 55:358-63
