# Supplementary material
Source: PubMed Central journal article supplement (PMC4597785)
Supplement: NIHMS691455-supplement-SDC_5.pdf [file NIHMS691455-supplement-SDC_5.pdf]

# Thoracic epidural analgesia reduces post-thoracotomy pain

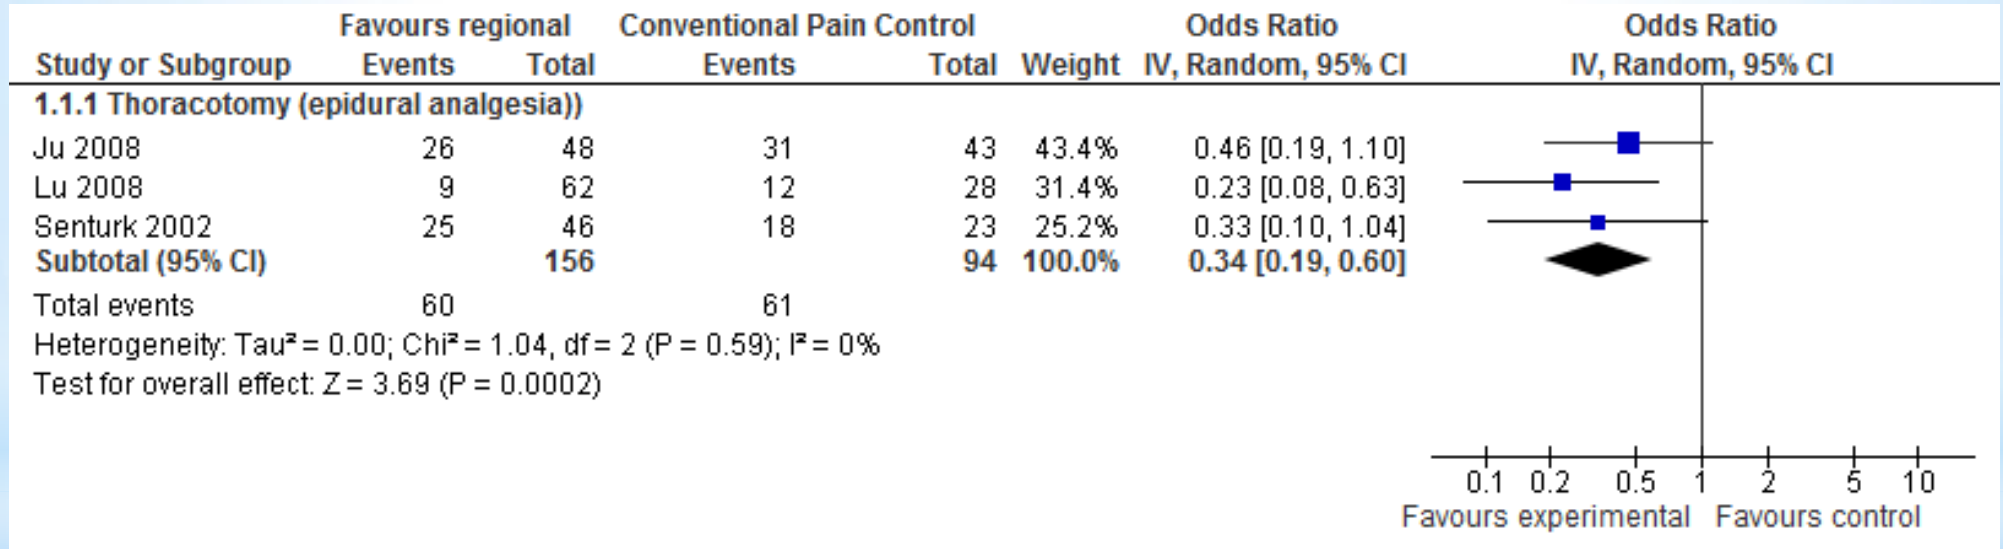

Using epidural anesthesia may reduce the risk of developing persistent pain six months after thoracotomy in one patient out of every three to four patients treated.

**NNT 4; Recommendation: Level 1; Grade A**

*From Andreae MH, Andreae DA. Local anaesthetics and regional anaesthesia for preventing chronic pain after surgery. Cochrane Database Syst Rev 2012, Issue 10. Art. No.: CD007105. Copyright © 2013 The Cochrane Collaboration. Published by John Wiley & Sons, Ltd.*
