# Supplementary material
Source: PubMed Central journal article supplement (PMC4597785)
Supplement: NIHMS691455-supplement-SDC_6.pdf [file NIHMS691455-supplement-SDC_6.pdf]

# Cesarean Section

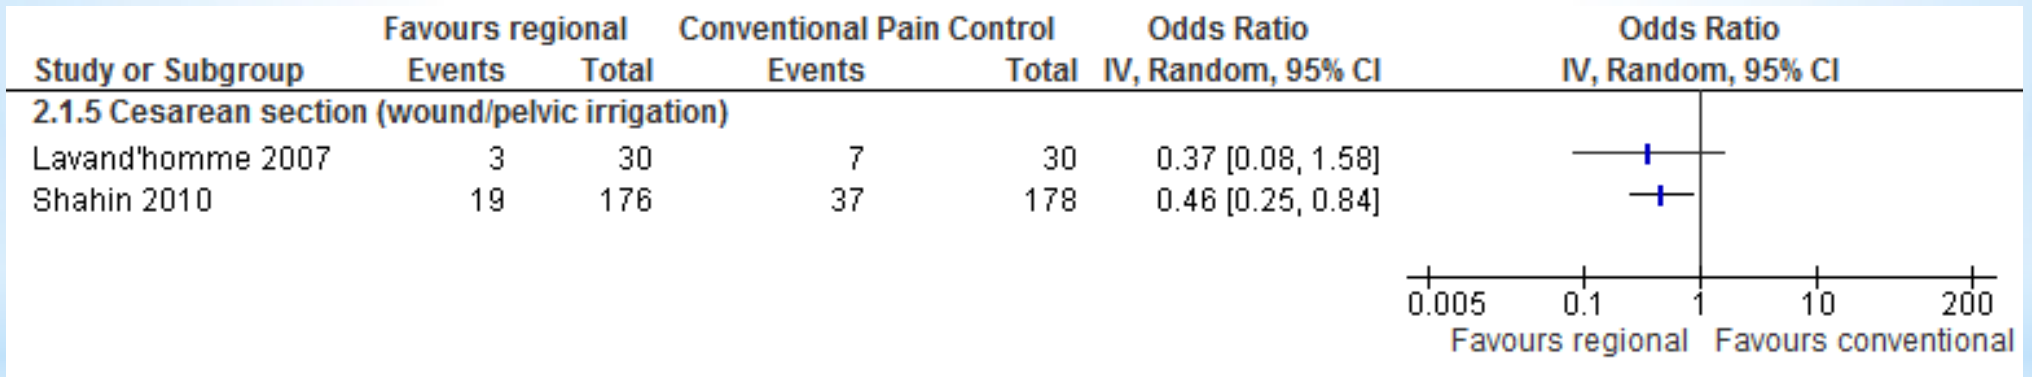

Continuous wound infiltration and peritoneal instillation prevent chronic pain after cesarean section.

*From Andreae MH, Andreae DA. Local anaesthetics and regional anaesthesia for preventing chronic pain after surgery. Cochrane Database Syst Rev 2012, Issue 10. Art. No.: CD007105. Copyright © 2013 The Cochrane Collaboration. Published by John Wiley & Sons, Ltd.*
